# Supplementary material for: OsGRF4AA compromises heat tolerance of developing pollen grains in rice
Source: Front Plant Sci. 2023 Feb 22;14:1121852. doi: 10.3389/fpls.2023.1121852 (PMC9992635; doi:10.3389/fpls.2023.1121852)
Supplement: Supplementary file 5 [file Table_1.xls]

## Sheet: Supplementary table1. align_sta
An overview of RNA-Seq data
Sample	Total_reads	Total_mapped	Multiple_mapped	Unique_mapped
GS2CK1	42816362	41186381(96.19%)	7411596(17.31%)	33774785(78.88%)
GS2CK2	45077564	43283244(96.02%)	6524435(14.47%)	36758809(81.55%)
GS2CK3	40488032	38956362(96.22%)	4402606(10.87%)	34553756(85.34%)
GS2HS1	45728422	43878386(95.95%)	3069864(6.71%)	40808522(89.24%)
GS2HS2	41805378	39983398(95.64%)	3361147(8.04%)	36622251(87.6%)
GS2HS3	45145654	43422013(96.18%)	2660308(5.89%)	40761705(90.29%)
ZH11CK1	44167598	42492691(96.21%)	10665304(24.15%)	31827387(72.06%)
ZH11CK2	42770702	41226894(96.39%)	6517794(15.24%)	34709100(81.15%)
ZH11CK3	41037592	39661758(96.65%)	9773996(23.82%)	29887762(72.83%)
ZH11HS1	43395566	41745757(96.2%)	2787580(6.42%)	38958177(89.77%)
ZH11HS2	42644350	40970338(96.07%)	4034366(9.46%)	36935972(86.61%)
ZH11HS3	42029892	40405425(96.13%)	2494743(5.94%)	37910682(90.2%)
